# Supplementary material for: Empowering Researchers to Query Medical Data and Biospecimens by Ensuring Appropriate Usability of a Feasibility Tool: Evaluation Study
Source: PubMed Central journal article supplement (PMC10157450; doi:10.2196/43782), 2023-04-19
Supplement: humanfactors_v10i1e43782_app1.pdf [file humanfactors_v10i1e43782_app1.pdf]

## Evaluation of the ABIDE feasibility tool – Test tasks

**While working on the test task, please think aloud** and say at any time:

- What would you do now?
- How would you proceed with this?
- What works well in the process /What do you like about the ABIDE Feasibility Tool?
- What is problematic for you in this process and why?

### Test task 1

**Task 1a)** Please determine the **number of those patients** who have the following characteristics:

*Inclusion criteria:*

- Female patients
- All available consents for
  - the use and collection of clinical data
  - the use of biosamples
  - Re-contacting possibilities
- Essential (primary) hypertension

*Exclusion criteria:*

- Administration of diuretics

**Task 1b)** Now save your query.

### Test task 2

**Task 2)**

Please determine the **number of those patients** who have the following characteristics:

*Inclusion criteria:*

- Patients with diabetes mellitus, type 1
- Biosamples: serum **or** citrated plasma

*Exclusion criteria:*

- Glucose value in blood lower than 160mg/dL in the period 01.01.2021 - 30.04.2021

### Test task 3

**Task 3)**

Please determine the **number of patients** for whom there is at least one documented administration of the antibiotic vancomycin and who received intensive care treatment at the site prior to 01.01.2021.
