# Supplementary material for: Empowering Researchers to Query Medical Data and Biospecimens by Ensuring Appropriate Usability of a Feasibility Tool: Evaluation Study
Source: PubMed Central journal article supplement (PMC10157450; doi:10.2196/43782), 2023-04-19
Supplement: humanfactors_v10i1e43782_app2.pdf [file humanfactors_v10i1e43782_app2.pdf]

## Evaluation of the ABIDE feasibility tool – Questionnaires

| <b>System Usability Scale</b>                                                           |                          |                 |                |              |                       |
|-----------------------------------------------------------------------------------------|--------------------------|-----------------|----------------|--------------|-----------------------|
| <b>Statement</b>                                                                        | <b>Strongly disagree</b> | <b>Disagree</b> | <b>Neutral</b> | <b>Agree</b> | <b>Strongly agree</b> |
| I think that I would like to use this tool frequently.                                  |                          |                 |                |              |                       |
| I found the tool unnecessarily complex.                                                 |                          |                 |                |              |                       |
| I thought the tool was easy to use.                                                     |                          |                 |                |              |                       |
| I think that I would need the support of a technical person to be able to use this tool |                          |                 |                |              |                       |
| I found the various functions in this tool were well integrated.                        |                          |                 |                |              |                       |
| I thought there was too much inconsistency in this tool.                                |                          |                 |                |              |                       |
| I would imagine that most people would learn to use this tool very quickly.             |                          |                 |                |              |                       |
| I found the tool very cumbersome to use.                                                |                          |                 |                |              |                       |
| I felt very confident using the tool.                                                   |                          |                 |                |              |                       |
| I needed to learn a lot of things before I could get going with this tool.              |                          |                 |                |              |                       |

| <b>Additional questions related to the criteria search</b>              |                          |                 |                |              |                       |
|-------------------------------------------------------------------------|--------------------------|-----------------|----------------|--------------|-----------------------|
| <b>Statement</b>                                                        | <b>Strongly disagree</b> | <b>Disagree</b> | <b>Neutral</b> | <b>Agree</b> | <b>Strongly agree</b> |
| I was able to find my way properly when searching for criteria.         |                          |                 |                |              |                       |
| I had a hard time finding criteria using the free text search.          |                          |                 |                |              |                       |
| I had the feeling that I found the relevant criteria during the search. |                          |                 |                |              |                       |
| I perceived the finding of criteria via the category tree as difficult. |                          |                 |                |              |                       |

| <b>Questions about characteristics of the study cohort</b>                                                                                                                                                                                           |                                                                                                                                                                                                                                                                                                                     |
|------------------------------------------------------------------------------------------------------------------------------------------------------------------------------------------------------------------------------------------------------|---------------------------------------------------------------------------------------------------------------------------------------------------------------------------------------------------------------------------------------------------------------------------------------------------------------------|
| <b>Age group</b>                                                                                                                                                                                                                                     |                                                                                                                                                                                                                                                                                                                     |
| What age group do you belong to?: <ul style="list-style-type: none"> <li>• Younger than 25 years</li> <li>• 25 to 34 years</li> <li>• 35 to 44 years</li> <li>• 45 to 50 years</li> <li>• 55 to 64 years or</li> <li>• 65 years and older</li> </ul> | <input type="checkbox"/> Younger than 25 years<br><input type="checkbox"/> 25 to 34 years<br><input type="checkbox"/> 35 to 44 years<br><input type="checkbox"/> 45 to 54 years<br><input type="checkbox"/> 55 to 64 years<br><input type="checkbox"/> 65 years and older<br><input type="checkbox"/> Not specified |
| <b>Professional Groups</b>                                                                                                                                                                                                                           |                                                                                                                                                                                                                                                                                                                     |
| To which professional group do you belong: <ul style="list-style-type: none"> <li>• Researchers</li> <li>• Personnel with biobanking background</li> <li>• IT specialist in research environment</li> <li>• Others</li> </ul>                        | <input type="checkbox"/> Researchers<br><input type="checkbox"/> Biobanker/in Personnel with biobanking background<br><input type="checkbox"/> IT specialist in research environment<br><input type="checkbox"/> Others (please indicate):<br>_____<br><input type="checkbox"/> Not specified                       |
| <b>Work experience</b>                                                                                                                                                                                                                               |                                                                                                                                                                                                                                                                                                                     |
| How long have you worked in your current position?                                                                                                                                                                                                   | <input type="checkbox"/> In years: _____<br><input type="checkbox"/> Not specified                                                                                                                                                                                                                                  |
| <b>Prior experience with feasibility queries</b>                                                                                                                                                                                                     |                                                                                                                                                                                                                                                                                                                     |
| How would you rate your experience with requesting case numbers for clinical trials?                                                                                                                                                                 | <input type="checkbox"/> No experience<br><input type="checkbox"/> Some experience<br><input type="checkbox"/> Lot of experience<br><input type="checkbox"/> Not specified                                                                                                                                          |
| <b>Prior experience with similar systems</b>                                                                                                                                                                                                         |                                                                                                                                                                                                                                                                                                                     |
| Have you used other similar systems in the past?                                                                                                                                                                                                     | <input type="checkbox"/> No<br><input type="checkbox"/> Yes/ which? (please indicate):<br>_____<br><input type="checkbox"/> Not specified                                                                                                                                                                           |
| <b>IT knowledge</b>                                                                                                                                                                                                                                  |                                                                                                                                                                                                                                                                                                                     |
| How would you rate your computer skills/knowledge?                                                                                                                                                                                                   | <input type="checkbox"/> Low: I find many systems difficult to use.<br><input type="checkbox"/> Medium: I get along well with most systems.<br><input type="checkbox"/> High: I am very experienced and technically skilled.<br><input type="checkbox"/> Not specified                                              |
| <b>Medical knowledge</b>                                                                                                                                                                                                                             |                                                                                                                                                                                                                                                                                                                     |
| How would you rate your medical knowledge?                                                                                                                                                                                                           | <input type="checkbox"/> Very low<br><input type="checkbox"/> Rather low<br><input type="checkbox"/> Medium<br><input type="checkbox"/> Rather high<br><input type="checkbox"/> Very high<br><input type="checkbox"/> Not specified                                                                                 |
