# Supplementary material for: Empowering Researchers to Query Medical Data and Biospecimens by Ensuring Appropriate Usability of a Feasibility Tool: Evaluation Study
Source: PubMed Central journal article supplement (PMC10157450; doi:10.2196/43782), 2023-04-19
Supplement: humanfactors_v10i1e43782_app3.pdf [file humanfactors_v10i1e43782_app3.pdf]

## Evaluation of the ABIDE feasibility tool – Scoring system for the assessment of the correctness of task processing

### General notes

- If it is obvious that the user forgot to start the query, then the point is still given, or, if a query was started at least once, then this is considered as correctly executed for all tasks.
- If a substep was solved in a different way e.g. via exclusion, but is correct in content, then the point is still given.

### Task 1a

| Points          | Substep                                                                                                                                                                                                            | Special cases                                               |
|-----------------|--------------------------------------------------------------------------------------------------------------------------------------------------------------------------------------------------------------------|-------------------------------------------------------------|
| 1               | Female patients                                                                                                                                                                                                    |                                                             |
| 1               | Use and collection of clinical data<br>"Collection, processing and scientific use (items 1.1 - 1.3)"                                                                                                               |                                                             |
| 1               | Use of biosamples<br><u>REQUIRED:</u> "Biosamples: consent for collection, storage, and scientific use (items 3.1-3.3)"<br><u>Optional:</u> "Biosamples: extraction of small additional quantities (item 3.2)"     |                                                             |
| 1               | Re-contacting possibilities: At least one of the following two criteria:<br>"Re-contact; additional scientific questions,... (item 4.1)"<br>"Re-contact: information about additional medical findings (item 4.2)" |                                                             |
| 1               | Essential (primary) hypertension                                                                                                                                                                                   | „Essential hypertension, unspecified“ does not give a point |
| 1               | Diuretics                                                                                                                                                                                                          |                                                             |
| 1               | Correct linking of the criteria                                                                                                                                                                                    |                                                             |
| 1               | Running the query                                                                                                                                                                                                  |                                                             |
| Total: 8 points |                                                                                                                                                                                                                    |                                                             |

### Task 1b

| Points         | Substep          | Special cases |
|----------------|------------------|---------------|
| 1              | Saving the query |               |
| Total: 1 point |                  |               |

### Task 2

| Points          | Substep                                                      | Special cases                                                           |
|-----------------|--------------------------------------------------------------|-------------------------------------------------------------------------|
| 1               | Diabetes mellitus, type 1                                    |                                                                         |
| 1               | Serum<br>„Serum specimen (specimen)“                         | „available“ can - but does not have to be ticked                        |
| 1               | Citrated plasma<br>„Plasma specimen with citrate (specimen)“ | „available“ but does not have to be ticked                              |
| 1               | Glucose/blood                                                | "Glucose (2345-7)" and "Glucose venous (41652-9)" also gives a point    |
| 1               | < 160 mg/dL                                                  | Input with operator "between" instead of with "less" also gives a point |
| 1               | Between 01.01.2021 to 30.04.2021                             |                                                                         |
| 1               | Correct linking of the criteria                              |                                                                         |
| 1               | Running the query                                            |                                                                         |
| Total: 8 points |                                                              |                                                                         |

| <b>Task 3</b>          |                                                                                                                                         |                                                                                                                                                                                                                                                                                                |
|------------------------|-----------------------------------------------------------------------------------------------------------------------------------------|------------------------------------------------------------------------------------------------------------------------------------------------------------------------------------------------------------------------------------------------------------------------------------------------|
| Points                 | Substep                                                                                                                                 | Special cases                                                                                                                                                                                                                                                                                  |
| 1                      | All three vancomycin listed under Medication                                                                                            | <ul style="list-style-type: none"> <li>• If the vancomycin laboratory finding is added as a fourth characteristic (in addition to the other three, then there is no point given</li> <li>• If an additional time restriction was made with vancomycin, then there is no point given</li> </ul> |
| 1                      | Intensive medical treatment<br>REQUIRED: "Intensive care treatment"<br>Optional: "Intensive medical complex treatment", ... or similar. |                                                                                                                                                                                                                                                                                                |
| 1                      | Prior to 01.01.2021                                                                                                                     | If operator was not changed and e.g. the input was made via "between", then there is no point given                                                                                                                                                                                            |
| 1                      | Correct linking of the criteria                                                                                                         | If multiple vancomycins have been selected, they must be linked with OR                                                                                                                                                                                                                        |
| 1                      | Running the query                                                                                                                       |                                                                                                                                                                                                                                                                                                |
| <b>Total: 5 points</b> |                                                                                                                                         |                                                                                                                                                                                                                                                                                                |
